# Supplementary material for: Alterations of redox and iron metabolism accompany the development of HIV latency
Source: PubMed Central journal article supplement (PMC7196916; doi:10.15252/embj.2019102209), 2020-03-11
Supplement: EMBJ-39-e102209-s010.pdf [file EMBJ-39-e102209-s010.pdf]

Figure 4C

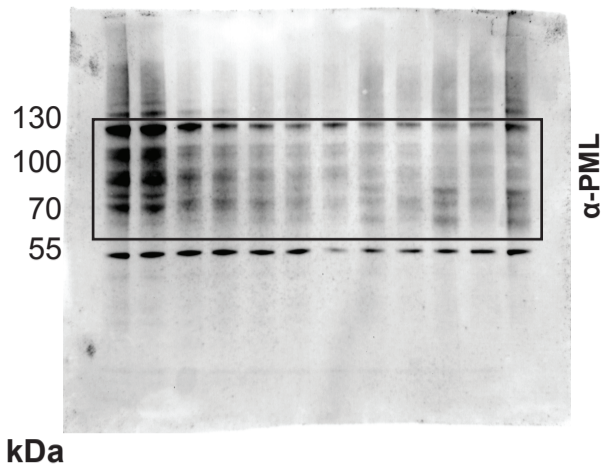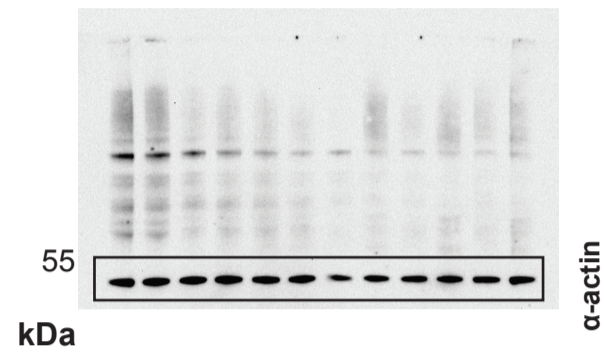

Figure 4E

left panel

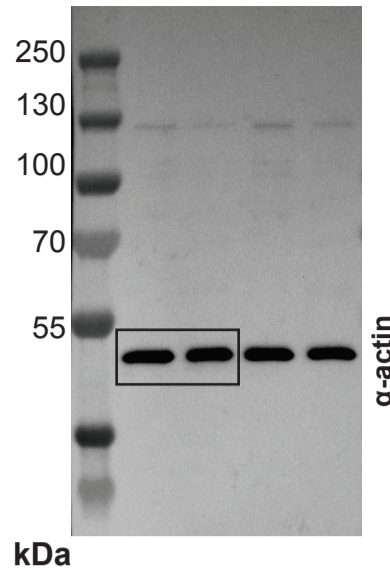

kDa

right panel

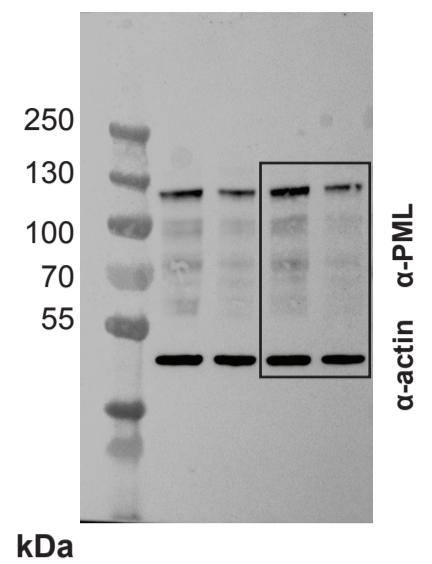

kDa

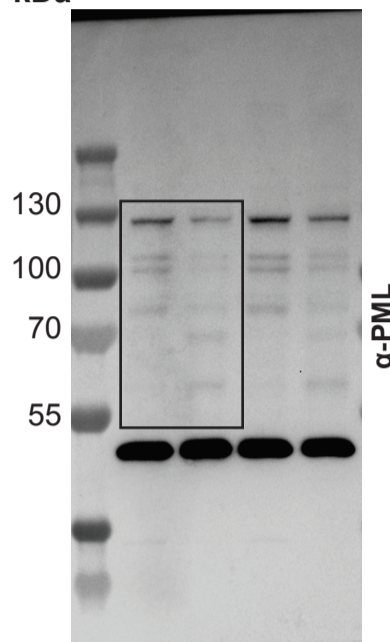

kDa

Figure 4F

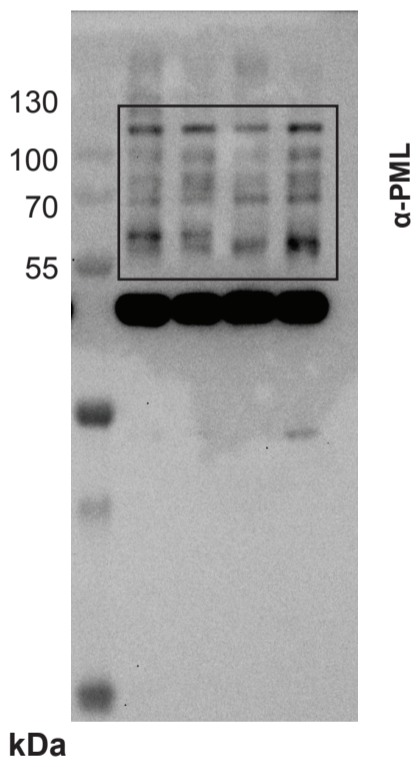

kDa

Figure 4G

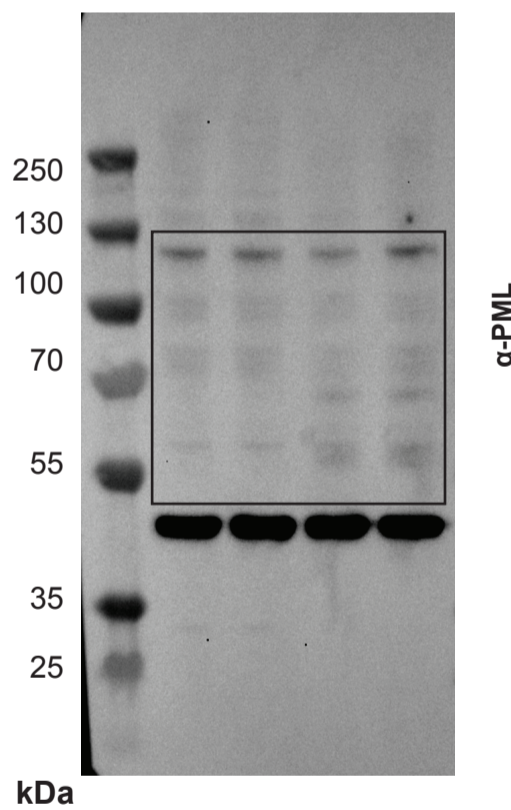

kDa

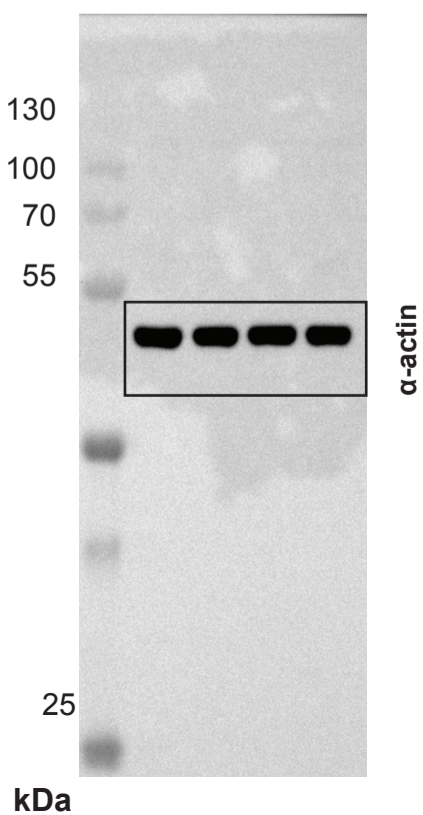

kDa

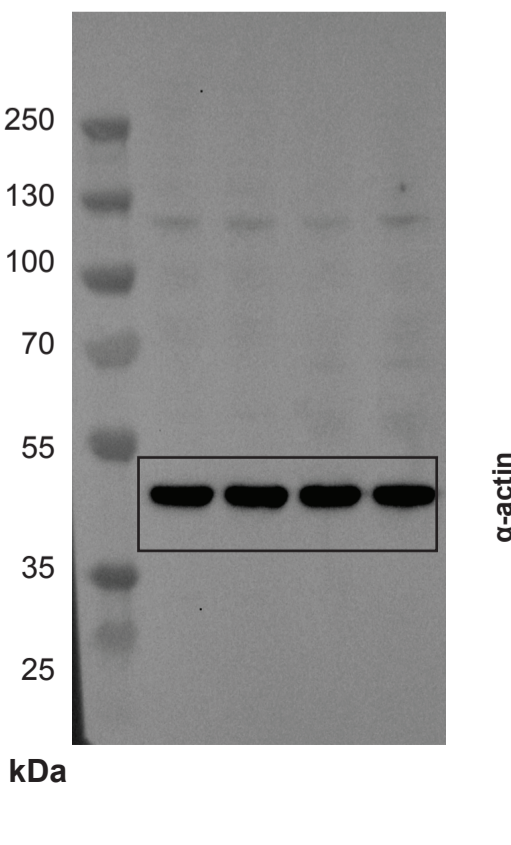

kDa
